# Supplementary material for: Physical robustness and resilience among long-lived female siblings: a comparison with sporadic long-livers
Source: PubMed Central journal article supplement (PMC7425496; doi:10.18632/aging.103618), 2020-07-11
Supplement: aging-12-103618-s001..pdf [file aging-12-103618-s001..pdf]

## SUPPLEMENTARY TABLE

Supplementary Table 1. Coding of the 20 most prevalent conditions in Danes aged 75+ on National Danish databases.

| No. | Conditions                                                                                                               | Databases* | Definition                                                                                                                                                                                                                                                                                                                                                                                                                                                    |
|-----|--------------------------------------------------------------------------------------------------------------------------|------------|---------------------------------------------------------------------------------------------------------------------------------------------------------------------------------------------------------------------------------------------------------------------------------------------------------------------------------------------------------------------------------------------------------------------------------------------------------------|
| 1   | <b>Malignant neoplasms</b>                                                                                               | DNC        | All except ICD-10 C44                                                                                                                                                                                                                                                                                                                                                                                                                                         |
|     | <b>Endocrine nutritional and metabolic diseases</b>                                                                      |            |                                                                                                                                                                                                                                                                                                                                                                                                                                                               |
| 2   | Disorders of lipoprotein metabolism / other lipidemias (e.g. hypercholesterolaemia, hyperglyceridaemia, hyperlipidaemia) | NPR        | ICD-8: 279<br>ICD10: E78                                                                                                                                                                                                                                                                                                                                                                                                                                      |
|     |                                                                                                                          | DNPR       | ATC: C10                                                                                                                                                                                                                                                                                                                                                                                                                                                      |
| 3   | Diabetes                                                                                                                 | NPR        | ICD-8: 249, 250                                                                                                                                                                                                                                                                                                                                                                                                                                               |
|     | Diabetes type 1                                                                                                          |            | ICD-10: E10-E14                                                                                                                                                                                                                                                                                                                                                                                                                                               |
|     | Diabetes type 2                                                                                                          | DNPR       | ATC: A10A, A10B.                                                                                                                                                                                                                                                                                                                                                                                                                                              |
|     | Diabetes others                                                                                                          |            | At least two prescriptions.                                                                                                                                                                                                                                                                                                                                                                                                                                   |
|     | <b>Diseases of the eye and adnexa and diseases of the ear and mastoid process</b>                                        |            |                                                                                                                                                                                                                                                                                                                                                                                                                                                               |
| 4   | Choroid and retina disorders                                                                                             | NPR        | ICD-8: 367, 376, 377.0-377.4<br>ICD-10: H31, H32, H34, H35                                                                                                                                                                                                                                                                                                                                                                                                    |
| 5   | Diseases of eye lens (cataracts)                                                                                         | NPR        | ICD-8: 374<br>ICD-10: H25-H28                                                                                                                                                                                                                                                                                                                                                                                                                                 |
| 6   | Glaucoma                                                                                                                 | NPR        | ICD-8: 375<br>ICD-10: H40-H42                                                                                                                                                                                                                                                                                                                                                                                                                                 |
|     |                                                                                                                          | DNPR       | ATC: S01E                                                                                                                                                                                                                                                                                                                                                                                                                                                     |
| 7   | Hearing loss                                                                                                             | NPR        | ICD-8: 389, 781.3<br>ICD-10: H90, H910, H912, H913,<br>H918, H930, H932, H933, H911, H919                                                                                                                                                                                                                                                                                                                                                                     |
|     | <b>Diseases of the circulatory system</b>                                                                                |            |                                                                                                                                                                                                                                                                                                                                                                                                                                                               |
| 8   | Hypertensive diseases                                                                                                    | NPR        | ICD-8: 400-404<br>ICD-10: I10-I15                                                                                                                                                                                                                                                                                                                                                                                                                             |
|     |                                                                                                                          | DNPR       | Combination treatment with at least two of the following classes of hypertensive drugs with ATC codes:<br>- $\alpha$ Adrenergic blockers (C02A, C02B, C02C)<br>- Non-loop diuretics (C02DA, C02L, C03A, C03B, C03D, C03E, C03X, C07C, C07D, C08G, C09BA, C09DA, C09XA52)<br>- Vasodilators (C02DB, C02DD, C02DG, C04, C05)<br>- $\beta$ Blockers (C07)<br>- Calcium channel blockers (C07F, C08, C09BB, C09DB)<br>- Renin-angiotensin system inhibitors (C09) |
| 9   | Atrial fibrillation and flutter                                                                                          | NPR        | ICD-8: 427.93, 427.94<br>ICD-10: I48                                                                                                                                                                                                                                                                                                                                                                                                                          |
| 10  | Ischaemic heart diseases (including myocardial infarction)                                                               | NPR        | ICD-8: 410-414<br>ICD-10: I20-I25                                                                                                                                                                                                                                                                                                                                                                                                                             |
| 11  | Cerebrovascular diseases (including stroke)                                                                              | NPR        | ICD-8: 430-438<br>ICD-10: I60-69, G45, G46<br>DZ501 A-diagnosis in combination with I61, I63-64 as A- or B- diagnosis                                                                                                                                                                                                                                                                                                                                         |
|     | <b>Diseases of respiratory system</b>                                                                                    |            |                                                                                                                                                                                                                                                                                                                                                                                                                                                               |
| 12  | Respiratory allergy                                                                                                      | NPR        | ICD-8: 507.00-507.03, 507.08, 507.09<br>ICD-10: J30 except J30.0                                                                                                                                                                                                                                                                                                                                                                                              |
|     |                                                                                                                          | DNPR       | ATC: V01AA02, V01AA03, V01AA05, V01AA11, R01AC, R01AD, R06A, S01G, R01BA52                                                                                                                                                                                                                                                                                                                                                                                    |
| 13  | Chronic lower respiratory diseases                                                                                       | NPR        | ICD-8: 490-492<br>ICD-10: J40-43, J47                                                                                                                                                                                                                                                                                                                                                                                                                         |

|    |                                                                     |      |                                                                                                                                                                             |
|----|---------------------------------------------------------------------|------|-----------------------------------------------------------------------------------------------------------------------------------------------------------------------------|
|    |                                                                     | DNPR | ATC: R03AC, R03AK, R03BA, R03BB, R03CC, R03DA, R03DC, V03AN01<br>Except if cystic fibrosis (ICD-8 273.0, ICD-10 E84) or COPD medication or asthma specific medication       |
| 14 | COPD                                                                | NPR  | ICD-8: 491, 492<br>ICD-10: J44                                                                                                                                              |
|    |                                                                     | DNPR | ATC: R03AC18, R03AC19, R03AL02, R03AL03, R03AL04, R03BB04, R03BB05, R03BB06, R03DX07<br>Except if cystic fibrosis (ICD-8 273.0, ICD-10 E84)                                 |
| 15 | Asthma                                                              | NPR  | ICD-8: 493<br>ICD-10: J45-J46                                                                                                                                               |
|    |                                                                     | DNPR | ATC: R03DC03<br>Except if cystic fibrosis (ICD-8 273.0, ICD-10 E84)                                                                                                         |
|    | <b>Diseases of digestive system</b>                                 |      |                                                                                                                                                                             |
| 16 | Ulcers                                                              | NPR  | ICD-8: 531-534<br>ICD-10: K25-K27                                                                                                                                           |
|    |                                                                     | DNPR | ATC: A02BD                                                                                                                                                                  |
|    | <b>Diseases of the musculoskeletal system and connective tissue</b> |      |                                                                                                                                                                             |
| 17 | Osteoporosis                                                        | NPR  | ICD-8: 723.0<br>ICD-10: M80-M81                                                                                                                                             |
|    |                                                                     | DNPR | ATC: M05BA01, M05BA04, M05BA06, M05BA07, M05BB01, M05BB03, G03XC01, H05AA02, H05AA03                                                                                        |
| 18 | Arthrosis                                                           | NPR  | ICD-10: M15-M19                                                                                                                                                             |
|    | <b>Mental and behavioural disorders</b>                             |      |                                                                                                                                                                             |
| 19 | Depression                                                          | NPR  | ICD-8: 296.09, 296.29, 296.99, 298.09, 300.49, 300.19<br>ICD-10: F32, F33, F34.1, F06.32                                                                                    |
|    |                                                                     | DNPR | ATC: N06A                                                                                                                                                                   |
| 20 | Dementia                                                            | NPR  | ICD-8: 290.09, 290.10, 290.11, 290.12, 290.13, 290.14, 290.15, 290.16, 290.17, 290.18, 290.19, 293.09<br>ICD-10: F00, G30, F01, F02.0, F03.9, G31.8B, G31.8E, G31.9, G31.0B |
|    |                                                                     | DNPR | ATC: N06D                                                                                                                                                                   |

\* DNC: Danish Cancer Registry, NPR: Danish National Patient Register, DNPR: Danish National Prescription Register.
